# Supplementary material for: mRNA vaccine-elicited antibodies to SARS-CoV-2 and circulating variants
Source: Springer Nature journal article supplement (doi:10.1038/s41586-021-03324-6), 2021-02-10
Supplement: MOESM3 [file 41586_2021_3324_MOESM3_ESM.xlsx]

## Sheet: Sheet1
	SI Table 2. Neutralization of wt/KEN pseudovirus by convalescent plasma
			1.3 months after infection								6.2 months after infection								fold-reduction
	Participant ID		NT50				NT80				NT50				NT80				1.3 months				6.2 months
			wt		KEN		wt		KEN		wt		KEN		wt		KEN		NT50		NT80		NT50		NT80
	674		4396.83		1901.52		996.389		439.106		1255.38		1017.94		465.915		342.503		2.31227		2.26913		1.23326		1.36032
	401		2679.85		2992.42		759.822		854.867		759.822		854.867		459.073		435.229		0.895545		0.888819		0.888819		1.05478
	403		2659.49		2399.87		602.08		748.158		602.08		748.158		218.762		199.494		1.10818		0.80475		0.80475		1.09658
	241		2084.08		1287.36		752.152		516.32		360.186		237.203		101.155		68.2621		1.61887		1.45676		1.51847		1.48187
	314		1937.24		939.316		479.043		221.927		1002.45		565.876		257.549		186.123		2.06239		2.15856		1.77151		1.38376
	507		1925.52		975.375		465.7		228.865		927.951		390.882		224.173		110.158		1.97413		2.03483		2.37399		2.03502
	119		1701.45		1246.78		474.174		372.486		524.17		458.292		102.459		71.4579		1.36467		1.273		1.14375		1.43384
	393		1686.94		281.605		398.7		49.788		466.517		162.037		84.0719		40.314		5.99045		8.00795		2.87909		2.08543
	352		1460.98		620.751		266.469		106.309		488.135		261.312		119.193		81.0628		2.35357		2.50655		1.86802		1.47038
	157		1459.02		3014.18		510.511		662.869		510.511		662.869		210.295		164.632		0.484051		0.770153		0.770153		1.27737
	437		1439.46		709.239		352.571		167.31		864.904		652.258		167.263		178.889		2.02958		2.10729		1.32602		0.935008
	633		1432.64		503.852		397.352		131.782		304.761		197.469		44.6884		37.2121		2.84337		3.01521		1.54333		1.20091
	190		1329.96		1113.2		278.893		253.442		278.893		253.442		248.985		182.615		1.19472		1.10042		1.10042		1.36344
	192		1221.68		456.251		309.126		96.6348		908.729		303.51		265.165		65.8201		2.67764		3.1989		2.99407		4.02863
	186		1218.51		790.337		203.095		109.352		203.095		109.352		129.898		83.5847		1.54176		1.85727		1.85727		1.55409
	310		1137.16		363.04		336.313		49.9925		336.313		49.9925		147.074		32.0253		3.13232		6.72725		6.72725		4.59241
	132		1101.98		2396.82		396.508		765.117		396.508		765.117		204.084		182.344		0.459769		0.518232		0.518232		1.11923
	57		1056.7		1465.21		335.001		327.34		335.001		327.34		31.0995		19.5583		0.721195		1.0234		1.0234		1.59009
	537		1028.31		2070.38		193.955		167.04		419.744		656.808		93.5357		99.005		0.496677		1.16113		0.639066		0.944758
	8		1024.31		374.415		140.938		54.2487		140.938		54.2487		133.242		102.488		2.73575		2.598		2.598		1.30007
	135		1019.45		736.021		218.719		208.807		918.261		425.889		248.804		148.913		1.38509		1.04747		2.1561		1.6708
	509		973.502		501.574		213.376		83.5441		443.109		181.214		94.6254		44.4214		1.94089		2.55405		2.44522		2.13017
	96		971.871		567.102		240.268		141.41		903.967		310.984		251.073		98.6878		1.71375		1.69909		2.9068		2.54411
	154		957.726		1306.57		290.585		317.278		290.585		317.278		219.623		239.161		0.73301		0.915867		0.915867		0.918308
	222		873.734		318.219		140.26		63.1309		389.237		214.731		82.2302		23.5033		2.7457		2.22173		1.81267		3.49867
	478		866.321		157.354		215.12		38.4789		362.789		157.012		75.1054		30.5721		5.50556		5.5906		2.31058		2.45667
	328		771.346		487.265		156.011		70.2231		156.011		70.2231		140.826		51.2853		1.58301		2.22165		2.22165		2.74593
	75		735.568		1079.79		66.9103		136.108		241.324		103.245		16.5395		14.3741		0.681214		0.491597		2.3374		1.15065
	230		716.023		313.409		193.802		137.315		619.601		390.086		220.754		151.832		2.28463		1.41137		1.58837		1.45394
	287		646.001		309.388		167.045		125.977		330.226		222.037		77.3384		49.6808		2.08799		1.326		1.48725		1.5567
	539		623.407		186.476		105.246		47.3076		856.564		735.789		263.394		267.855		3.3431		2.22473		1.16414		0.983343
	120		619.229		112.923		94.1243		21.4291		186.598		65.1937		18.4398		3.76461		5.48366		4.39235		2.86221		4.8982
	123		613.587		62.1728		142.65		13.7385		251.398		16.6782		44.535		0.513458		9.86906		10.3833		15.0735		86.7355
	76		586.567		229.738		105.475		48.9707		139.674		41.0023		14.9171		7.06459		2.55319		2.15385		3.4065		2.11154
	172		547.686		282.005		127.417		67.233		230.314		67.1455		67.4185		16.1917		1.94211		1.89516		3.43007		4.16377
	38		523.253		335.801		101.609		43.2336		101.609		43.2336		1140.16		438.539		1.55822		2.35023		2.35023		2.5999
	98		495.562		327.05		56.2802		13.4383		56.2802		13.4383		80.5615		51.4273		1.51525		4.18804		4.18804		1.56651
	256		427.384		246.67		79.0484		42.9552		79.0484		42.9552		128.252		83.3593		1.73262		1.84025		1.84025		1.53854
	470		403.259		130.594		59.2362		25.3607		294.335		149.647		48.5052		31.5351		3.08788		2.33575		1.96686		1.53813
	114		372.167		154.662		70.3555		27.0176		495.916		305.222		113.384		85.6493		2.40633		2.60407		1.62477		1.32382
	323		297.958		10.2569		27.1992		0.980217		146.099		7.22888		18.2929		1.29648		29.0497		27.7481		20.2105		14.1097
	131		145.56		31.7584		7.73172		4.23514		116.293		25.1751		16.881		1.13572		4.58334		1.82561		4.61938		14.8637
	506		125.488		45.5305		5.72212		6.341		145.782		77.1349		16.207		13.296		2.75613		0.9024		1.88996		1.21894
	48		101.149		99.1295		8.57941		6.48718		8.57941		6.48718		41.2931		29.8622		1.02038		1.32252		1.32252		1.38279
	178		60.0566		21.2007		1.98476		2.86364		50.0113		13.004		6.75876		2.77806		2.83277		0.693091		3.84585		2.43291
																		Average fold reduction	2.94203		2.92925		2.79012		4.33114
